# Supplementary material
Source: PubMed Central journal article supplement (PMC4005969)

**L1 ORF1p**

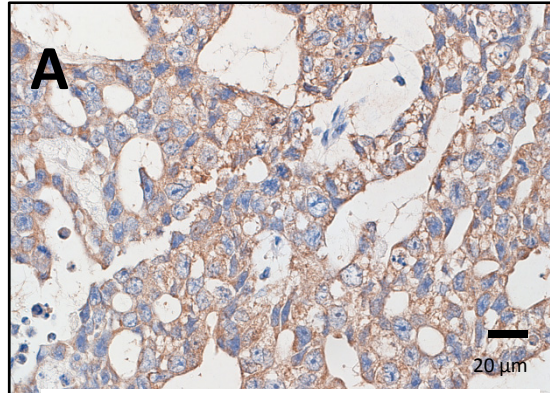

**embryonal carcinoma**

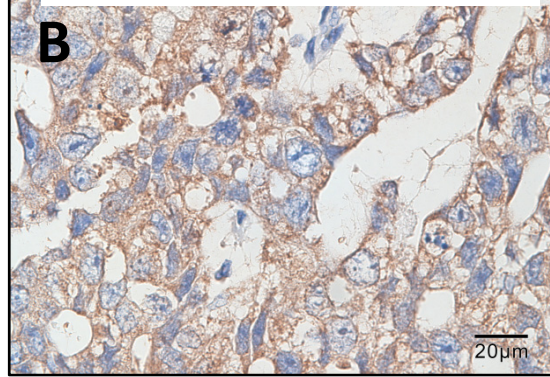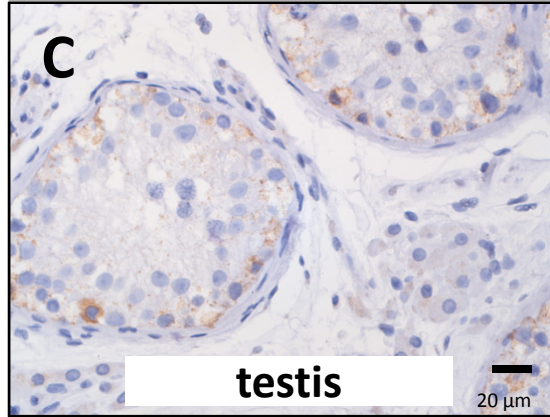

Supplement: mmc2.pdf [file mmc2.pdf]

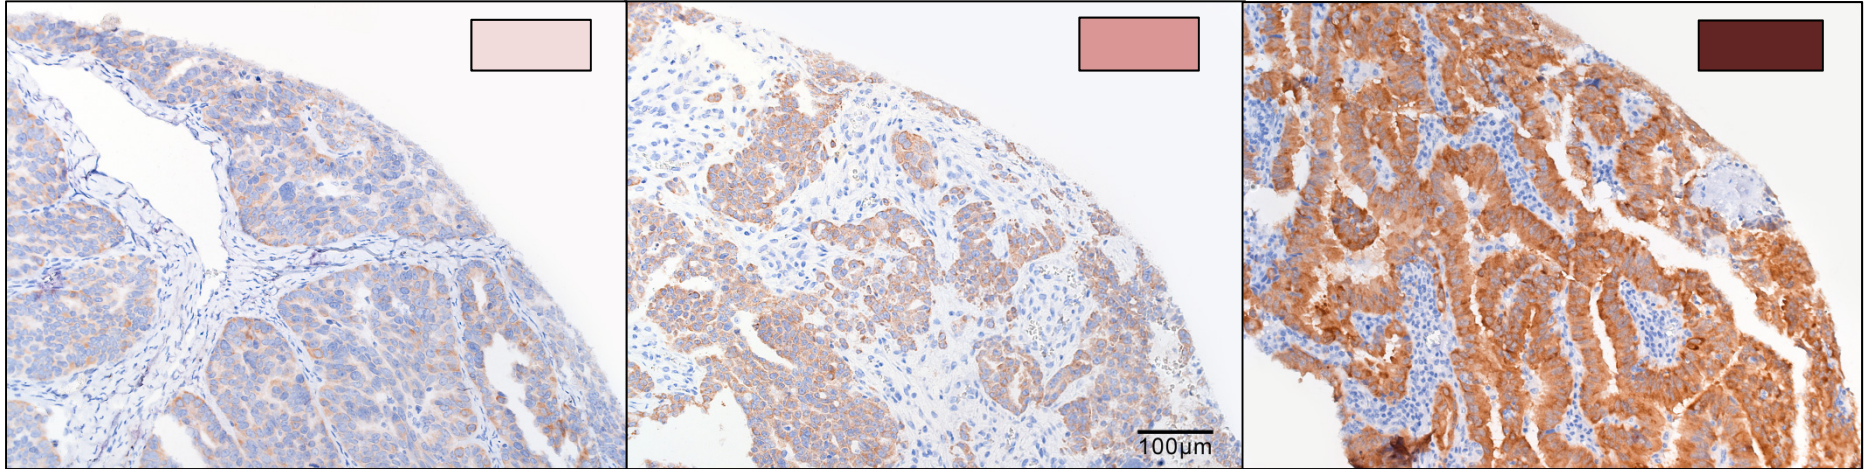

**LINE-1 Low**

**LINE-1 Intermediate**

**LINE-1 High**

Supplement: mmc4.pdf [file mmc4.pdf]

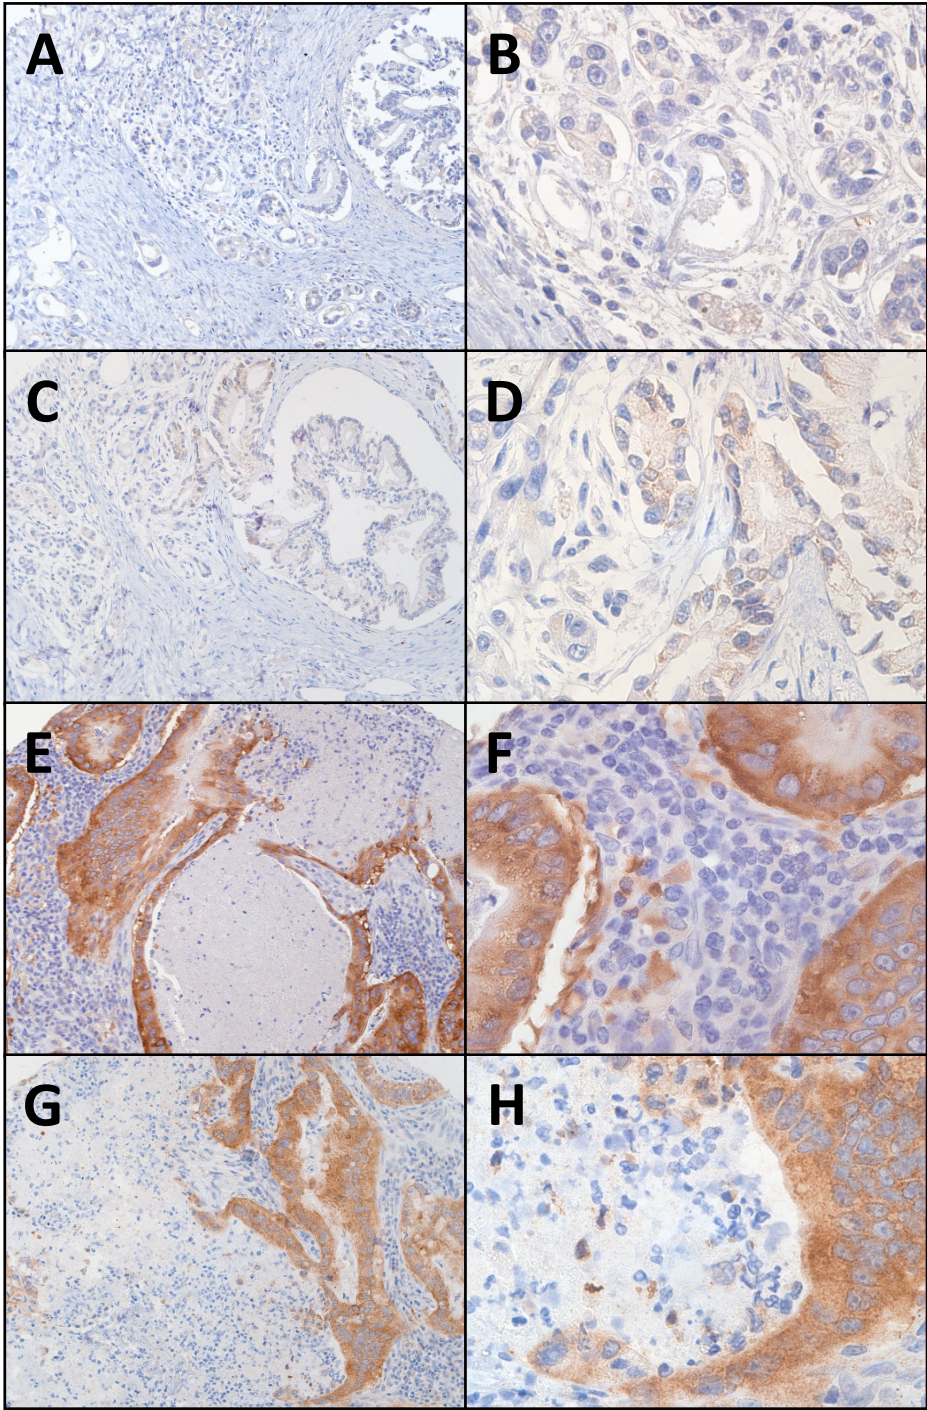

Supplement: mmc5.pdf [file mmc5.pdf]

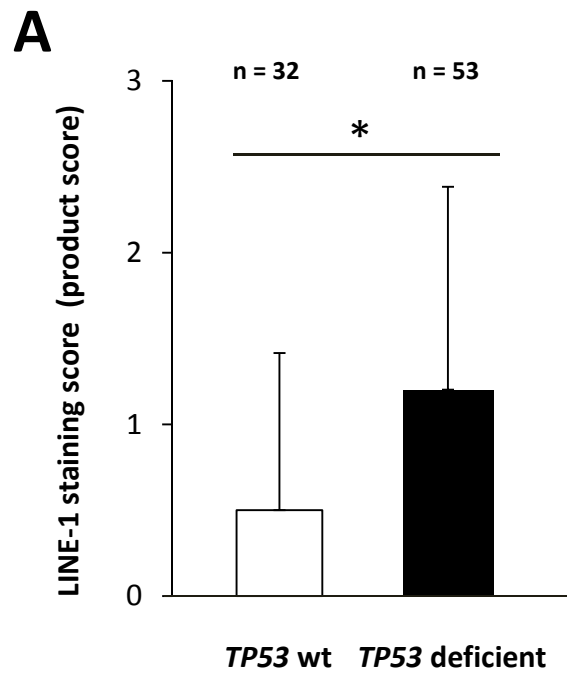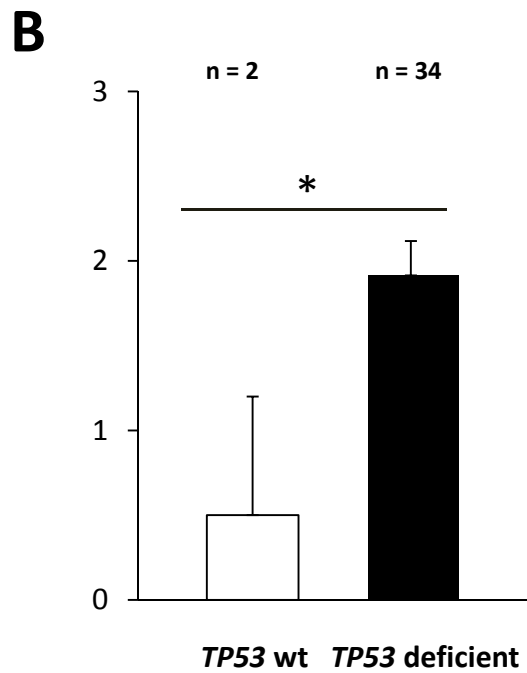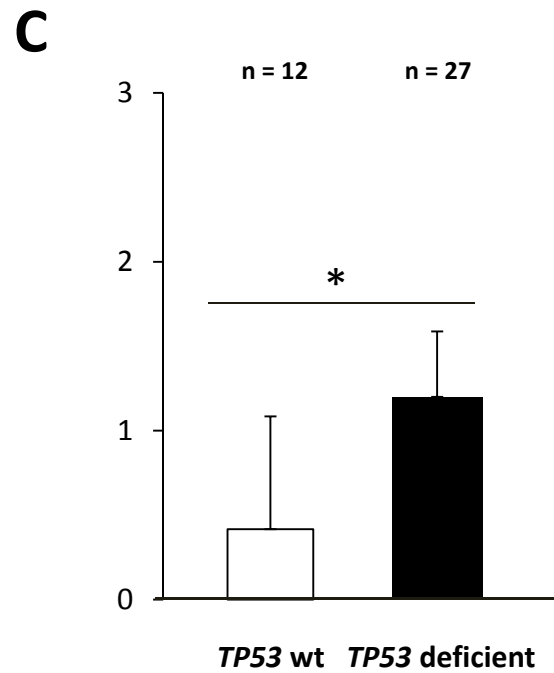

Supplement: mmc6.pdf [file mmc6.pdf]
